# Supplementary material
Source: PubMed Central journal article supplement (PMC5851874)
Supplement: NIHMS947424-supplement-Supplement.pdf [file NIHMS947424-supplement-Supplement.pdf]

## **Online Supplementary Material**

### **Supplementary Methods.**

Stool samples were collected with OMNIgeneGUT fecal collection kits (DNAGenotek) and stored at -80C until analysis of 16S rRNA gene amplicons using Illumina iTaq PCR amplification and MiSeq sequencing, and assigning microbial OTU via QIIMEv1.3 and Greengenes database, keeping hits with 97% identity. Blood collected in EDTA-tubes was fractionated and assayed for plasma LPS (Antibodies Online) and FABP2 (R&D Systems Quantikine kit) by sandwich ELISA; zonulin was assayed by competitive ELISA (Immundiagnostik AG). Data were analyzed with Galaxy, R packages including Phyloseq, and IBM SPSS Statistics software.

### **Supplementary legend to figure 1 of main manuscript.**

Linear discriminate analysis (LDA) and Phylogenetic investigation of communities by reconstruction of unobserved states (PICRUST) are shown for metagenome predicted KEGG ortholog genes. Data are shown for log LDA scores >2.0 threshold ( $P < .05$  for Kruskal-Wallis rank using closed reference OTU protocol).

### **Supplementary legend to figure 2 of main manuscript.**

Plasma LPS endotoxin, zonulin, and FABP2 are blood markers of gut dysbiosis and gut permeability pathophysiological epithelium integrity. Box-whisker plots are shown for DEP/ANX subjects (green) vs control reference subjects (red). ANOVA comparison of means are: LPS (mean difference 36.8 pg/ml, 95% CI 8.0 to 65.6,  $P = .014$ ); zonulin (mean difference 15.0 ng/ml, 95% CI 11.1 to 18.9,  $P < .001$ ); FABP2 (mean difference 0.29 ng/ml, 95% CI 0.03 to 0.55,  $P = .032$ ).

### **Supplementary figure S1.**

Differential gut microbiome distribution in DEP/ANX subjects vs control reference subjects. Linear discriminant analysis (LDA) effect size ("LEfSe") algorithm results are shown for log LDA scores >3.0 threshold ( $P < .05$  for Kruskal-Wallis rank test). Data for DEP/ANX subjects are shown vs control reference subjects.

**Supplementary figure S2.**

Cladogram representing LEfSe corresponding to gut microbiome taxa obtained from DEP/ANX subjects or control reference subjects. Shown are taxa with log LDA scores  $>3.0$  ( $P < .05$  for Kruskal-Wallis rank test).
